# Supplementary material for: Increased aperiodic gamma power in young boys with Fragile X Syndrome is associated with better language ability
Source: Springer Nature journal article supplement (doi:10.1186/s13229-021-00425-x), 2021-02-25
Supplement: MOESM1 [file 18903936]

**Supplemental Figure 1. FOOOF parameterization of power spectra.** FOOOF estimated aperiodic (blue) and periodic (red) components are shown for each group. Actual averaged power spectra shown in green.

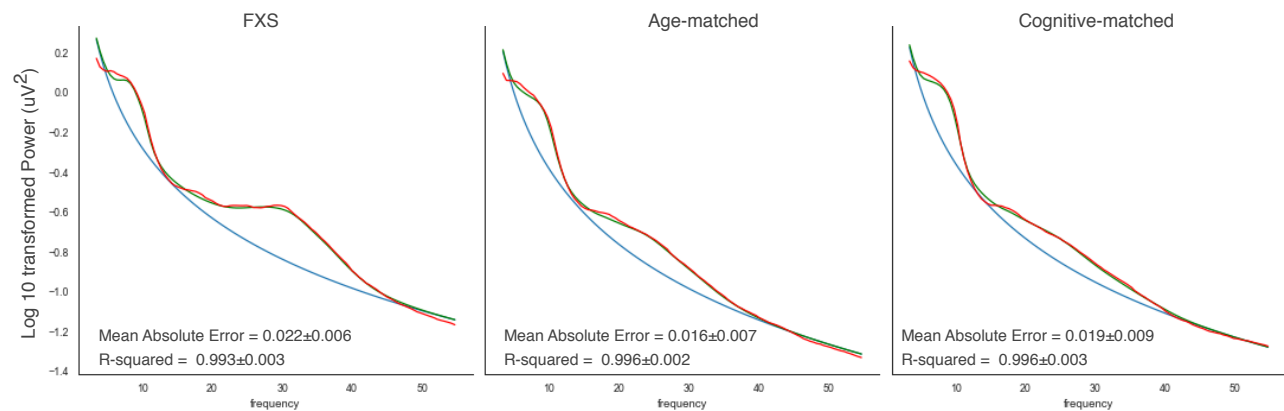

**Supplemental Figure 2. Individual Plots of (A) Aperiodic and (B) Aperiodic-Adjusted power spectra.**

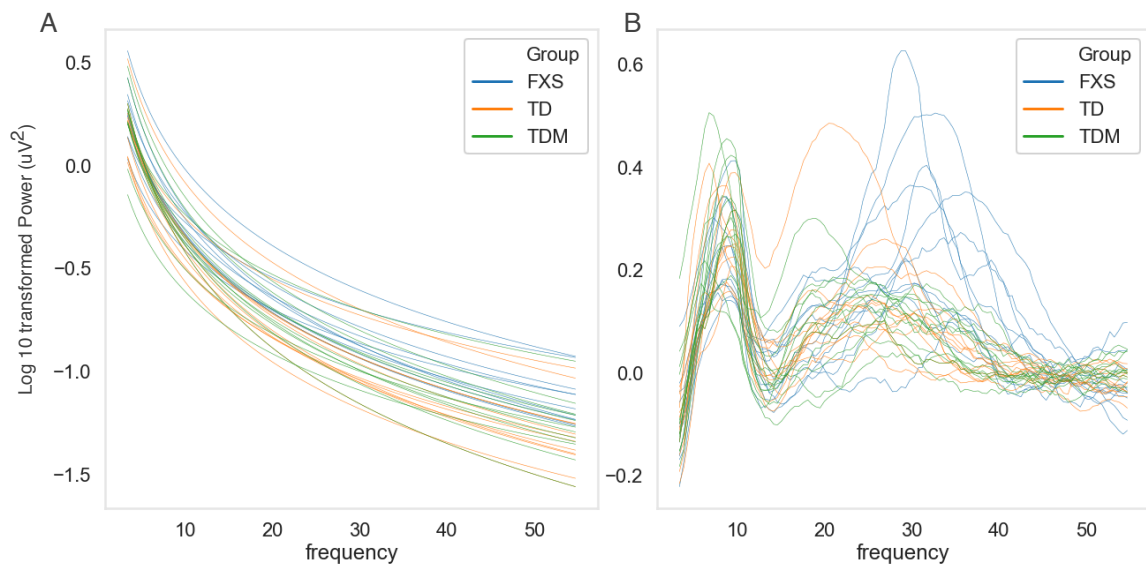

Supplemental Figure 3. Plots of Aperiodic and Aperiodic-Adjusted power spectra for all regions of interest

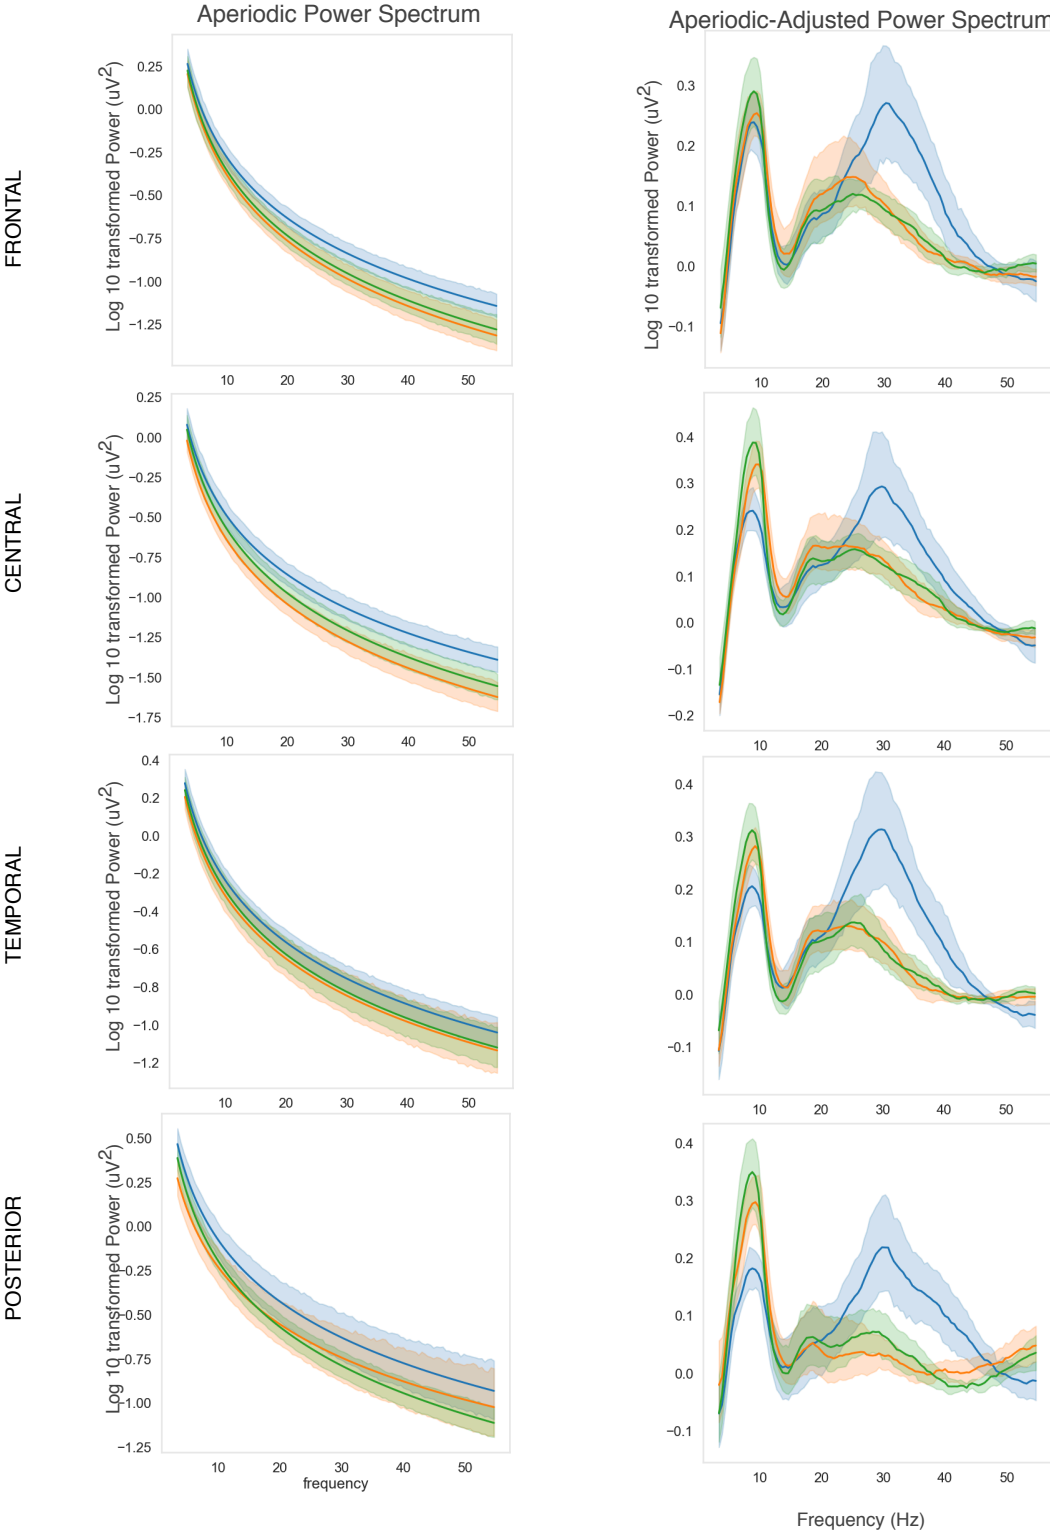

### Supplemental Figure 4. Association of Age and power spectra measures

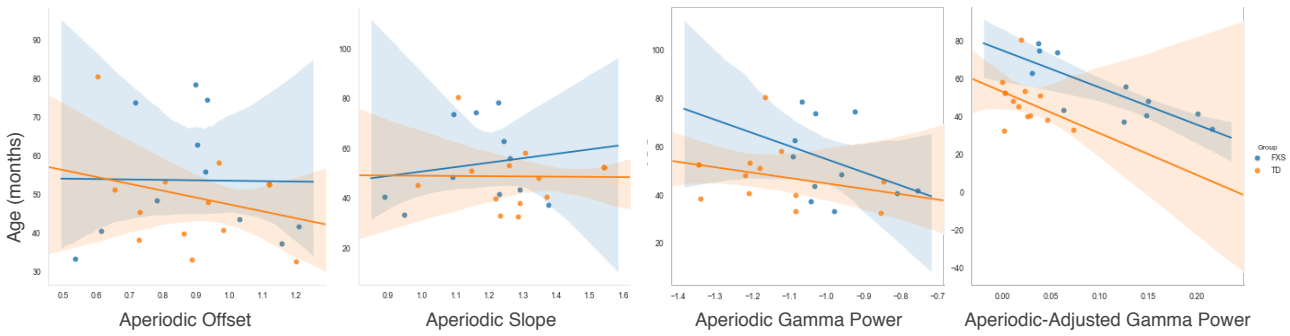

### Supplemental Figure 5. Correlation graphs of additional clinical measures

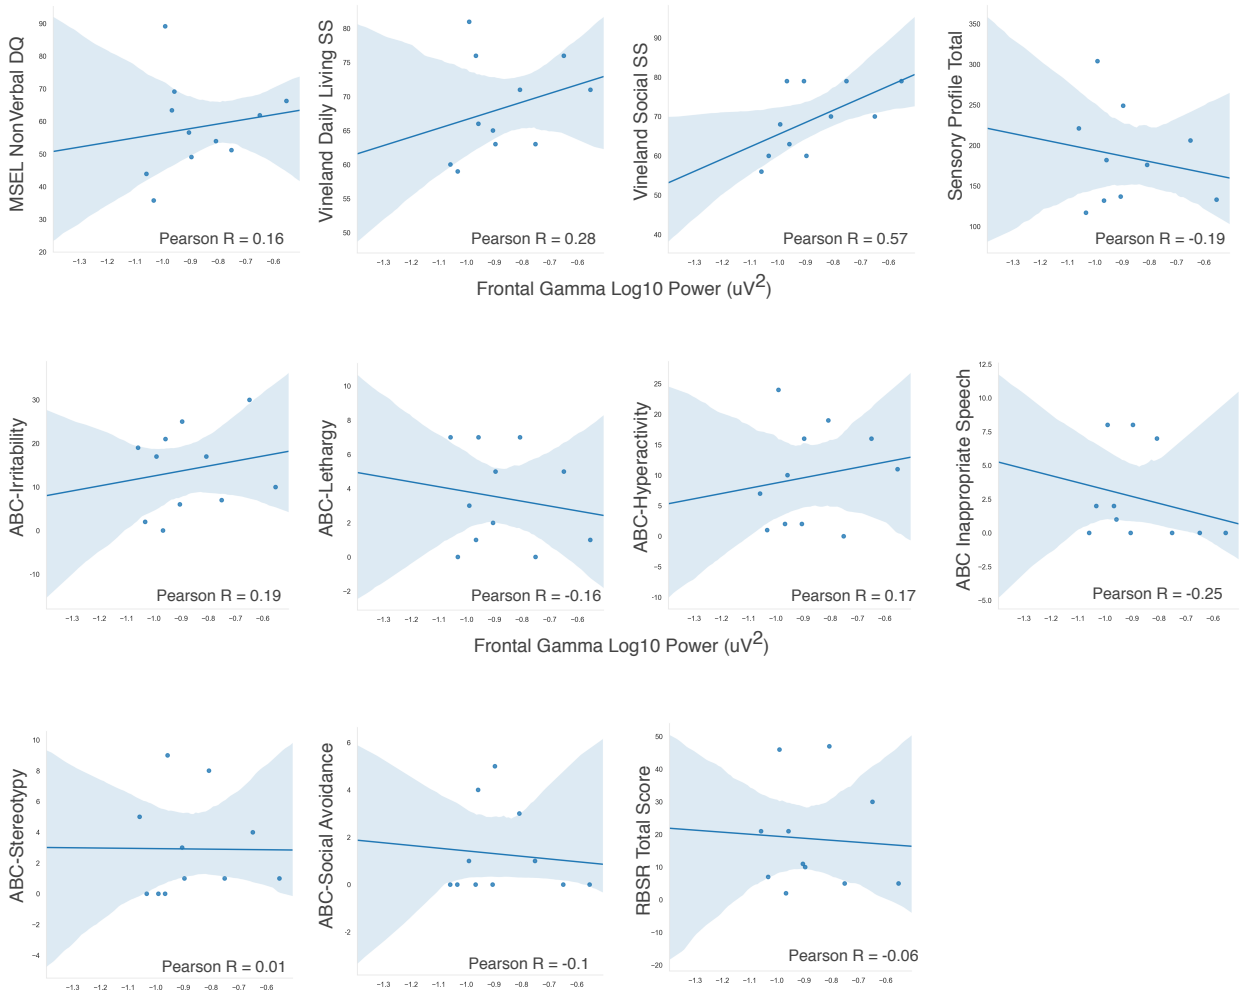

**Supplemental Table 1. Aperiodic-adjusted power spectra clusters**

| Region of Interest | FXS vs Age-Matched   |                 | FXS vs Cognitive-Matched |                 |
|--------------------|----------------------|-----------------|--------------------------|-----------------|
|                    | Frequency Range (Hz) | Cluster p-value | Frequency Range (Hz)     | Cluster p-value |
| Frontal            | <b>28.8-41.0</b>     | <b>0.003</b>    | <b>25.9-43.0</b>         | <b>0.005</b>    |
| Central            | 6.8-10.3             | 0.11            | 5.4-8.8                  | 0.137           |
| Central            | <b>26.4-38.1</b>     | <b>0.016</b>    | <b>25.9-36.1</b>         | <b>0.04</b>     |
| Central            | -                    | -               | 50.8-52.7                | 0.36            |
| Temporal           | 6.8-9.8              | 0.13            | 5.4-8.3                  | 0.18            |
| Temporal           | <b>23.4-43.0</b>     | <b>0.002</b>    | <b>24.4-43.0</b>         | <b>0.001</b>    |
| Temporal           | 48.3-53.2            | 0.14            | <b>47.4-53.2</b>         | <b>0.04</b>     |
| Posterior          | 4.9-9.3              | 0.08            | 4.4-8.8                  | 0.07            |
| Posterior          | <b>22.9-43.0</b>     | <b>0.002</b>    | <b>24.4-45.4</b>         | <b>0.02</b>     |
| Posterior          | 49.3-53.2            | 0.16            | 50.8-52.2                | 0.32            |
